# Supplementary material for: Retention during freezing of raindrops – Part 1: Investigation of single and binary mixtures of nitric, formic, and acetic acids and 2-nitrophenol
Source: Copernicus journal article supplement (doi:10.5194/acp-25-11813-2025), 2025-10-01
Supplement: Supplementary file 1 [file acp-25-11813-2025-supplement.pdf]

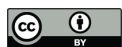

*Supplement of*

**Retention during freezing of raindrops – Part 1:  
Investigation of single and binary mixtures of nitric,  
formic, and acetic acids and 2-nitrophenol**

**Martanda Gautam et al.**

*Correspondence to:* Martanda Gautam ([mgautam@uni-mainz.de](mailto:mgautam@uni-mainz.de)) and Miklós Szakáll ([szakall@uni-mainz.de](mailto:szakall@uni-mainz.de))

The copyright of individual parts of the supplement might differ from the article licence.

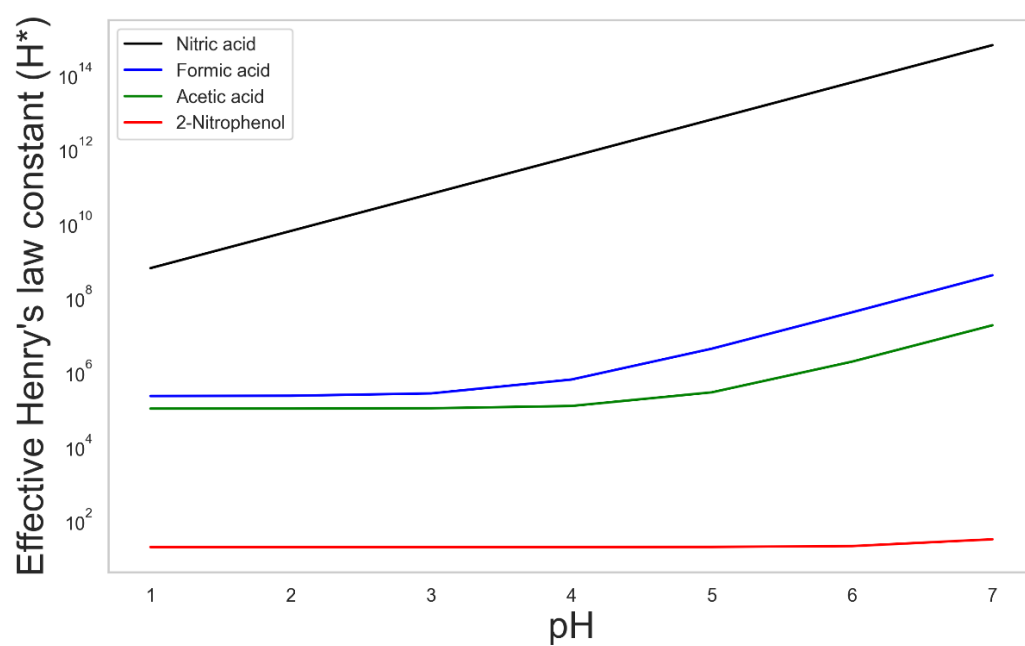

Figure S1: Variation of effective Henry's constat as a function of pH at 25°C for nitric, formic and acetic acids, and 2-nitrophenol

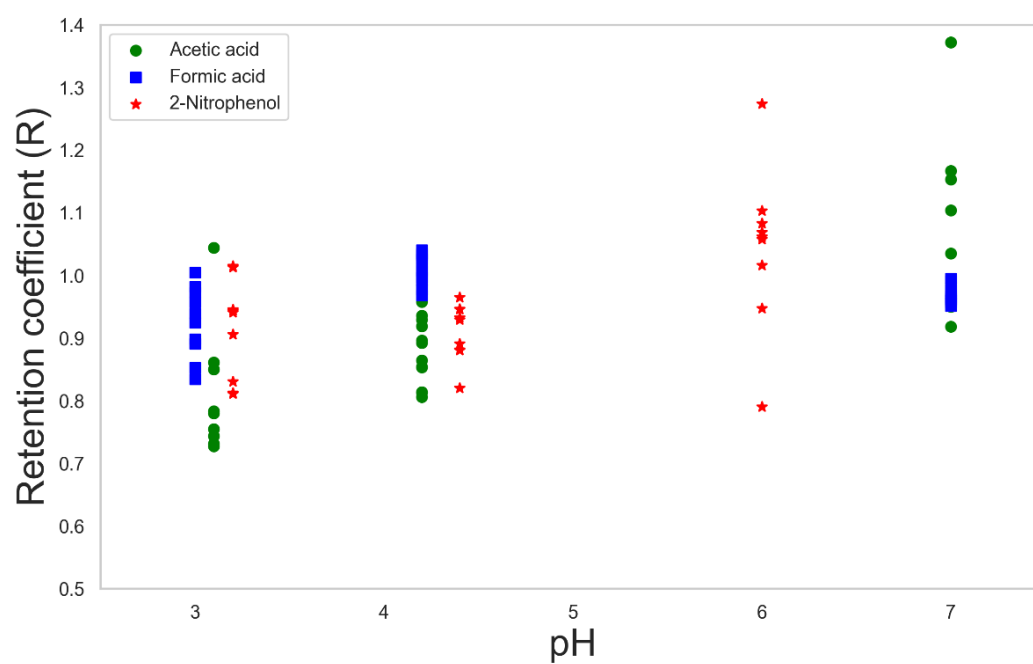

Figure S2: pH sensitivity of retention coefficients of single components, complementary to Figure 2(a) of the manuscript.
